# Supplementary material for: Rapid Identification of Novel Immunodominant Proteins and Characterization of a Specific Linear Epitope of Campylobacter jejuni
Source: PubMed Central journal article supplement (PMC3667084; doi:10.1371/journal.pone.0065837), 2013-05-29
Supplement: pone.0065837.s002.pdf [file pone.0065837.s002.pdf]

| Consensus                                                     | 1 | 10 | 11  |
|---------------------------------------------------------------|---|----|-----|
| Identity                                                      | X | I  | .XX |
| 1. <i>Campylobacter jejuni</i>                                | T | L  | K   |
| 2. <i>Campylobacter jejuni</i> subsp. <i>jejuni</i> CG8486    | . | .  | .   |
| 3. <i>Campylobacter jejuni</i> subsp. <i>jejuni</i> CG8421    | . | .  | .   |
| 4. <i>Campylobacter jejuni</i> RM1221                         | . | .  | .   |
| 5. <i>Campylobacter jejuni</i> subsp. <i>jejuni</i> 260.94    | . | .  | .   |
| 6. <i>Campylobacter jejuni</i> subsp. <i>jejuni</i> LMG 23223 | . | .  | .   |
| 7. <i>Campylobacter jejuni</i> subsp. <i>jejuni</i> D2600     | . | .  | .   |
| 8. <i>Campylobacter jejuni</i> subsp. <i>jejuni</i> 414       | . | .  | .   |
| 9. <i>Campylobacter jejuni</i> subsp. <i>jejuni</i> CF93-6    | . | .  | .   |
| 10. <i>Campylobacter jejuni</i> subsp. <i>jejuni</i> 2008-979 | . | .  | .   |
| 11. <i>Campylobacter jejuni</i> subsp. <i>jejuni</i> 60004    | . | .  | .   |
| 12. <i>Campylobacter jejuni</i>                               | . | .  | .   |
| 13. <i>Campylobacter jejuni</i> subsp. <i>jejuni</i> DFVF1099 | . | .  | .   |
| 14. <i>Campylobacter coli</i> 111-3                           | S | .  | N   |
| 15. <i>Campylobacter coli</i> RM2228                          | S | .  | N   |
| 16. <i>Campylobacter coli</i> 1098                            | S | .  | N   |
| 17. <i>Campylobacter upsaliensis</i> JV21                     | N | .  | .   |
| 18. <i>Campylobacter upsaliensis</i> RM3195                   | N | .  | .   |
| 19. <i>Campylobacter lari</i> RM2100                          | S | .  | D   |
| 20. <i>Campylobacter fetus</i> subsp. <i>fetus</i> 82-40      | G | I  | N   |
| 21. <i>Campylobacter showae</i> RM3277                        | S | I  | V   |
| 22. <i>Campylobacter rectus</i> RM3267                        | S | I  | V   |
| 23. <i>Campylobacter curvus</i> 525.92                        | S | I  | V   |
| 24. <i>Campylobacter concisus</i> 13826                       | S | I  | V   |
| 25. <i>Campylobacter</i> sp. 10_1_50                          | S | I  | V   |
| 26. <i>Campylobacter hominis</i> ATCC BAA-381                 | N | I  | V   |
| 27. <i>Sulfurospirillum barnesii</i> SES-3                    | S | I  | V   |
| 28. <i>Sulfurospirillum deleyianum</i> DSM 6946               | S | I  | V   |
| 29. <i>Arcobacter nitrofigilis</i> DSM 7299                   | E | I  | N   |
| 30. <i>Campylobacter gracilis</i> RM3268                      | S | I  | V   |
| 31. <i>Arcobacter</i> sp. L                                   | E | I  | N   |
| 32. <i>Arcobacter butzleri</i> RM4018                         | E | I  | N   |
| 33. <i>Helicobacter hepaticus</i> ATCC 51449                  | N | I  | L   |
| 34. <i>Helicobacter cinaedi</i> CCUG 18818                    | N | I  | L   |
| 35. <i>Helicobacter cinaedi</i> PAGU611                       | N | I  | L   |
| 36. uncultured <i>Sulfuricurvum</i> sp. RIFRC-1               | S | V  | S   |
| 37. <i>Sulfurimonas denitrificans</i> DSM 1251                | V | .  | Q   |
| 38. <i>Sulfurovum</i> sp. AR                                  | N | I  | Q   |
| 39. <i>Helicobacter bilis</i> ATCC 43879                      | K | I  | Q   |
| 40. <i>Helicobacter felis</i> ATCC 49179                      | K | I  | E   |
| 41. <i>Helicobacter mustelae</i> 12198                        | K | I  | Q   |
| 42. <i>Sulfuricurvum kujiense</i> DSM 16994                   | G | V  | S   |
| 43. <i>Helicobacter cetorum</i> MIT 00-7128                   | K | I  | E   |
| 44. <i>Helicobacter pylori</i> Aklavik117                     | K | I  | E   |
| 45. <i>Helicobacter cetorum</i> MIT 99-5656                   | K | I  | E   |
| 46. <i>Nitratiruptor</i> sp. SB155-2                          | K | V  | N   |
| 47. <i>Helicobacter suis</i> HS1                              | K | I  | E   |
| 48. <i>Helicobacter pylori</i> Shi417                         | K | I  | E   |
| 49. <i>Helicobacter pylori</i> CPY1662                        | K | I  | E   |
| 50. <i>Sulfurimonas gotlandica</i> GD1                        | K | V  | H   |
| 51. <i>Helicobacter pylori</i> 83                             | K | I  | E   |
| 52. <i>Helicobacter bizzozeronii</i> CIII-1                   | K | I  | E   |
| 53. <i>Helicobacter pylori</i> FD423                          | K | I  | Q   |
| 54. <i>Helicobacter pylori</i> CPY3281                        | K | I  | E   |
| 55. <i>Helicobacter pylori</i> CPY1124                        | K | I  | E   |
| 56. <i>Helicobacter pylori</i> PeCan4                         | K | I  | E   |
| 57. <i>Helicobacter pylori</i> Shi470                         | R | I  | E   |
| 58. <i>Helicobacter pylori</i> Hp P-41                        | R | I  | E   |
| 59. <i>Helicobacter pylori</i> Aklavik86                      | K | I  | E   |
| 60. <i>Helicobacter pylori</i> F32                            | K | I  | E   |
| 61. <i>Helicobacter pylori</i> GAM264Ai                       | R | I  | E   |
| 62. <i>Helicobacter pylori</i> GAM114Ai                       | R | I  | E   |
| 63. <i>Helicobacter pylori</i> HP116Bi                        | R | I  | E   |
| 64. <i>Helicobacter pylori</i> SouthAfrica7                   | K | I  | E   |
| 65. <i>Helicobacter pylori</i> Hp A-6                         | R | I  | E   |
| 66. <i>Helicobacter pylori</i> Hp H-36                        | R | I  | E   |
| 67. <i>Helicobacter pylori</i> 98-10                          | K | I  | E   |
| 68. <i>Helicobacter pylori</i> GAM260BSi                      | K | I  | E   |
| 69. <i>Helicobacter pylori</i> NQ4044                         | K | I  | E   |
| 70. <i>Helicobacter pylori</i> Hp H-28                        | K | I  | E   |
| 71. <i>Helicobacter pylori</i> J99                            | R | I  | E   |
| 72. <i>Helicobacter pylori</i> PeCan18                        | K | I  | E   |
| 73. <i>Helicobacter pylori</i> GAM71Ai                        | R | I  | E   |
| 74. <i>Helicobacter pylori</i> NQ392                          | K | I  | E   |
| 75. <i>Helicobacter acinonychis</i> str. Sheeba               | K | I  | E   |
| 76. <i>Helicobacter pylori</i> 2018                           | K | I  | E   |
| 77. <i>Wolinella succinogenes</i> DSM 1740                    | R | I  | Q   |
| 78. <i>Helicobacter pylori</i> Hp A-4                         | R | I  | E   |
| 79. <i>Helicobacter pylori</i> Hp A-8                         | K | I  | E   |
| 80. <i>Helicobacter pylori</i> SNT49                          | K | I  | Q   |
| 81. <i>Helicobacter pylori</i> GAM201Ai                       | R | I  | E   |
| 82. <i>Helicobacter pylori</i> R030b                          | K | I  | E   |
| 83. <i>Sulfurimonas autotrophica</i> DSM 16294                | K | V  | H   |
| 84. <i>Helicobacter pylori</i> 26695                          | K | I  | E   |
| 85. <i>Helicobacter pylori</i> B128                           | K | I  | E   |
| 86. <i>Helicobacter pylori</i> Hp A-17                        | R | I  | E   |
| 87. <i>Helicobacter pylori</i> Gambia94/24                    | R | I  | E   |
| 88. <i>Helicobacter pylori</i> Hp P-3                         | K | I  | E   |
| 89. <i>Helicobacter pylori</i> India7                         | R | I  | E   |
| 90. <i>Helicobacter pylori</i> HUP-B14                        | K | I  | E   |
| 91. <i>Nitratiruptor</i> <i>salsuginis</i> DSM 16511          | A | I  | R   |
| 92. <i>Helicobacter pylori</i> HPKX_438_AG0C1                 | K | I  | E   |
| 93. <i>Helicobacter pullorum</i> MIT 98-5489                  | N | I  | .   |
| 94. <i>Helicobacter pylori</i> Hp H-41                        | K | I  | E   |
| 95. <i>Helicobacter pylori</i> NQ4053                         | K | I  | E   |
| 96. <i>Sulfurovum</i> sp. NBC37-1                             | N | I  | R   |
| 97. <i>Caminibacter mediatlanticus</i> TB-2                   | D | .  | L   |
| 98. <i>Nautilia profundicola</i> AmH                          | H | .  | V   |
| 99. <i>Helicobacter canadensis</i> MIT 98-5491                | N | I  | .   |
| 100. <i>Thiovulum</i> sp. ES                                  | Q | V  | .   |
| 101. <i>Helicobacter pylori</i> Hp P-13                       | K | I  | E   |
